# Supplementary material
Source: Research Square preprint supplement (doi:10.21203/rs.3.rs-9437116/v1)
Supplement: Supplementary file 1 [file 8997bec34162b3dabdc14f71.docx]

Measurement-grade video for computer vision in Neurology: an international consensus framework for acquisition and reporting

**Supplementary Materials**

# **Introduction**

While general acquisition principles apply across domains, domain-specific constraints critically determine whether clinically meaningful signals can be captured. The following sections therefore translate consensus findings into domain-specific acquisition frameworks intended to facilitate video-based studies across a broad range of neurological use cases immediately.

1- Supplementary Figures

2- Domain specific protocols:

## i. Eye Movements

## ii. Face and head movements

iii. Hand and upper limb movements

## iv. Gait and posture

# **Supplementary Figures**

**Supplementary Figure** 1**. Panel characteristics, application priorities, and ground truth robustness**. (A) Geographic distribution of panelists, years of computer vision (CV) experience, and domain expertise (multiple selections permitted; percentages do not sum to 100%). (B) Priority ratings for five clinical application contexts; percentage at right = proportion rating the context as highest or high priority (top-2-boxes). Perceived robustness of three ground truth reference methods for neurological movement assessment; percentage at right = proportion rating the method as very or somewhat robust (top-2-box). All items are rated on a 5-point Likert scale. IMU, inertial measurement units.

**Supplementary Figure** 2**. Importance ratings for video acquisition factors** **from Round 1 survey (n = 23**). Stacked horizontal bars showing 5-point Likert rating distributions for 13 domain-general video acquisition factors. Items are grouped by consensus tier and sorted by endorsement rate (top-2-box: very important + somewhat important) descending within each tier. Consensus was defined as ≥70% endorsement; items below this threshold are shown in the no consensus tier. Percentage at right= top-2-box endorsement rate. Items were carried forward to the round 2-tiered confirmation survey (Block A).

**Supplementary Figure** 3**. Importance ratings of metadata reporting items from Round 1 survey (n = 23).** Stacked horizontal bars showing 5-point Likert rating distributions for 17 candidate metadata reporting items. Items are grouped by consensus tier and sorted by endorsement rate (top-2-box: very important + somewhat important) descending within each tier. Consensus was defined as ≥70% endorsement; items below this threshold are shown in the no consensus tier. Percentage at right= top-2-box endorsement rate. Items were carried forward to the round 2-tiered confirmation survey (Block B). CV, computer vision

# **Domain-specific protocols**

## **Eye Movements**

**Supplementary Figure** 4**. Domain-specific importance of acquisition parameters and key failure modes for video-based eye movement analysis based on round 1 survey results**. Temporal resolution and occlusion-related factors (e.g., eyelids, glasses) were most frequently identified as critical determinants, reflecting the high temporal precision required for capturing rapid ocular dynamics. Poor lighting and insufficient contrast further impair reliable pupil–iris tracking. Notably, standard 30Hz recordings were considered insufficient for high-velocity events such as saccades, emphasizing the need for high-frame-rate acquisition setups, and highlighting the importance of task x video setup x algorithm interactions.

### Why the eye movement domain matters clinically

Eye movements are sensitive proxies of brain circuit integrity. Distinct ocular motor signatures are established biomarkers across a broad range of neurological conditions, from vestibular dysfunction [1] to progressive supranuclear palsy [2] and neurometabolic disorders including Niemann-Pick disease type C [3]. In addition, they serve as trial endpoints in disorders like spinocerebellar ataxia 27B and downbeat nystagmus syndrome [4, 5]. Primary eye movement classes studied include fixation, smooth pursuit, saccades, nystagmus, and coupled eye-head movements during the head-impulse test. Core metrics are gain, velocity, latency, and frequency.

Video-oculography (VOG) using head-mounted goggle cameras is now established as a clinical standard, receiving FDA approval for vestibular diagnostics in 2013 [6], but remains resource-intensive and widely accessible. By contrast, computer-vision methods using smartphone- or consumer cameras - have demonstrated feasibility for scalable, low-cost oculomotor assessment across clinical and telemedicine settings [7-11].

### What needs to be visible and measurable

Eye movements impose the highest spatiotemporal demands of any movement domain: saccade velocities reach 500-700 °/s, yet clinically relevant amplitudes can be less than five degrees [12]. Consequently, temporal resolution is the primary determinant of metric validity and is not interchangeable across tasks. Following Nyquist-Shannon principles, slow-phase velocity in nystagmus or gain in smooth pursuit can be estimated at 30–60 Hz with acceptable agreement to head-mounted VOG [8, 9, 13, 14]. In contrast, saccadic parameters, like peak velocity in visually guided or head impulse paradigms, ideally require ≥120 Hz; at 60 Hz, saccade dynamics are poorly resolved and peak velocity may be systematically underestimated regardless of downstream algorithm quality [15, 16].

Spatial resolution relative to capture volume determines the system's detection floor for small-amplitude movements. Even minor relative movement between head and camera can introduce artefactual gaze displacement, necessitating a stable mount, sufficient facial framing, and ideally, some form of head stabilization [8, 13]. Alternatively, combined head and gaze tracking may allow more robust estimation of eye-in-head movements even in the presence of camera or head motion [15]. Novel tools for eye stabilization may help but require rigorous validation before clinical deployment.

A critical constraint is the interaction between framing and algorithm class. Some full-face landmark models like Mediapipe require whole-face visibility and fail on eye-crop recordings or in the presence of face occlusions such as face masks; conversely, eye-specific models were trained and validated on close-up crops and degrade on full-face framing [8]. Framing and algorithms must therefore be selected jointly and piloted before scaling. As a practical compromise, the closest possible full-face framing accommodates both algorithm classes, while for CV-based head impulse testing, the camera distance may need to be slightly increased to avoid losing the eyes during eccentric head rotations.

Calibration governs whether absolute gaze angles are recoverable. Sweep calibration is a robust approach, while fixation-based calibration runs are also feasible, but impose an extra experimental layer [10, 15, 17]. Anthropomorphic calibration using interpupillary distance has been shown to achieve comparable slow-phase velocity accuracy to reference standard without additional procedures, improving compatibility with telemedicine settings [8]. Without calibration, absolute gaze angles from model-based approximations are likely insufficient for clinical use, but relative metrics including nystagmus direction, waveform, and frequency remain extractable.

An inherent failure mode is that vertical eye movement tracking is generally less accurate than horizontal across all consumer-camera systems, disproportionately affecting tasks relying on vertical gaze metrics [8]. Likely contributors include transient occlusions from synkinetic lid movements and decreased algorithmic performance due to underrepresentation of extreme vertical gaze positions in the respective training data.

Finally, iris-pupil contrast affects segmentation fidelity independently of frame rate or framing. In low ambient light conditions and in patients with dark irides, pupil segmentation can degrade and gaze estimation becomes noisy, an effect directly observed in smartphone-based nystagmography pipelines and consistent with known performance disparities of computer vision models across skin tone and eye color distributions [8, 18]. Adequate diffuse illumination is therefore essential, and pilot testing on a demographically representative sample, including participants with darker irises, is recommended before deployment at scale. As an alternative, iris-based tracking could be explored, as the higher sclera-to-iris contrast may provide more stable gaze estimates under low-light conditions, and is insensitive to fluctuations in pupil size.

### Acquisition framework: Eye movements

Feasibility: 67% of domain experts estimated ≥70% of patients can meet mandatory criteria in their primary setting, reflecting the increased technical requirements of this domain relative to whole-body movement domains.

| **Parameter** | **Recommendation** | **Tier** |
| --- | --- | --- |
| Frame rate (fixation, nystagmus, smooth pursuit) | 30–60 Hz | Mandatory |
| Frame rate (saccades, head impulse testing) | ≥120 Hz | Mandatory |
| Framing | Full face visible throughout; maximized in frame unless downstream algorithm explicitly validated for cropped input | Mandatory |
| Lighting | Diffuse, non-blinding (e.g. portable ring light on tripod) to maximize tracking-relevant anatomical contrasts | Mandatory |
| Occlusions | Gaze stimuli (e.g. examiner's finger) positioned behind camera to minimize occlusions during task | Mandatory |
| Camera position | Eye level, 30–40 cm from subject; head impulse testing may require larger distance | Optimal |
| Head and camera stability | Tripod mount; chin rest or wall support recommended; post-processing eye stabilization can be considered but must be validated in advance | Optimal |
| Calibration | Sweep, anthropomorphic (interpupillary distance), or fixation-based for absolute gaze angles | Optimal |
| Iris contrast on dark irides | Pilot on demographically representative sample including darker-irided patients; document as limitation if not tested | Contextual |

**Supplementary Table** 1**.** Acquisition framework for creating measurement-grade video for eye movement analysis.

## **Face and head movements**

**Supplementary Figure .** **Domain-specific importance of acquisition parameters and failure modes for video-based facial movement analysis based on Round 1 survey results.** Spatial resolution, stable framing, and lighting conditions were identified as key determinants, while failure modes were primarily driven by occlusion, head movement, and loss of facial visibility within the frame. These findings reflect the dependence of facial analysis on stable appearance-based features and highlight the importance of head positioning and illumination.

**Supplementary Figure . Domain-specific importance of acquisition parameters and failure modes for video-based head and neck movement analysis based on Round 1 survey results.** Camera stability and sufficient capture of relevant body segments were identified as primary determinants, while out-of-plane motion and occlusion represented dominant failure modes. Given the limited number of domain experts contributing to this section, findings should be interpreted as directional, emphasizing the need for further systematic evaluation of acquisition requirements in this domain.

### Why the facial and head movement domain matters clinically

Facial and head movements are clinically informative because they are governed by distributed cortical, subcortical, brainstem and cerebellar circuits and executed via the cranial nerves and cervical motor systems. Control of facial movement involves multiple brain regions and is mediated through three functionally distinct branches of the facial nerve. The ophthalmic region receives both ipsilateral and contralateral cortical innervation, whereas the maxillary and mandibular regions are predominantly controlled contralaterally [19]. This differential innervation makes facial movement particularly sensitive to focal and network-level neurological dysfunction.

Facial and head movements comprise voluntary and involuntary motor behaviors that serve communicative, articulatory, protective, feeding, and regulatory functions [20-22]. Accordingly, subtle abnormalities may reflect early or selective neurodegenerative changes.

For instance, in isolated rapid eye movement sleep behavior disorder (iRBD), orofacial manifestations have been shown to be among the earliest detectable motor abnormalities, occurring up to a decade before the formal diagnosis of manifest synucleinopathy [23, 24]. From the perspective of atypical parkinsonian syndromes, distinct facial patterns are recognized: facial asymmetry in corticobasal degeneration (CBD); the “astonished” facial expression, vertical gaze palsy, and eyelid opening apraxia in progressive supranuclear palsy (PSP); and hypomimia or “masked face” in Parkinson’s disease and Multiple system atrophy (MSA) [25-28].

Moreover, nearly all major neurodegenerative disorders affect orofacial muscle control, including Huntington's disease [29, 30], Multiple sclerosis [31, 32], Amyotrophic lateral sclerosis [33, 34], and various ataxias [35-37]. Consequently, quantitative assessment of facial and head movement has significant potential as a diagnostic, differential, and progression biomarker across neurological diseases.

Facial movement assessment spans task paradigms that differ in ecological validity, voluntary control, and sensitivity to subtle motor abnormalities. Static facial images have shown questionable diagnostic performance [38, 39], likely because they fail to capture dynamic motor features. Accordingly, dynamic tasks have become the dominant approach.

Naturalistic tasks. Connected-speech tasks, such as monologue recordings or descriptions of familiar people [40-43], capture spontaneous facial activity during ecologically valid behavior. Dynamic facial expressions [44-51], either posed or mimicked, engage partially different neural processing pathways [52] and are generally more informative than static images, revealing motor features not explicitly represented in standard clinical scales (e.g., MDS-UPDRS item 3.2).

Blinking and gaze. Forced blinking tasks [53] are typically recorded and manually counted, primarily capturing slowed blinking. In contrast, resting-state blinking [54] enables millisecond-scale temporal characterization, with blinks defined as events lasting approximately 100 ms and recorded at high temporal resolution (1 kHz). Gaze analysis [55-57], via video-based methods or oculography, extends this domain but remains technically challenging from video alone.

Targeted activations. Structured tasks probe specific features such as asymmetry, eyelid closure strength, and abnormal voluntary facial movements. Tic suppression paradigms [58], involving recordings with and without voluntary suppression, provide a controlled framework to quantify abnormal motor output. Across paradigms, dynamic facial tasks consistently outperform static images, capturing motor characteristics missed by conventional rating scales.

Head movement assessment is often integrated with facial analysis but introduces additional kinematic dimensions. Phonation tests [59] quantify head tremor during sustained vocalization, while natural head motion [60] can be assessed during spontaneous facial expression or other tasks. Sustained gaze and eye–head coordination paradigms enable detection of gaze abnormalities and impaired coordination between ocular and cervical motor systems.

### What needs to be visible and measurable?

Most analyses of facial and head movement rely on dynamic assessment but are highly sensitive to physiological, behavioral, and technical confounders.

Physiological factors include fatigue [61], medication effects (e.g., antihistamines, antidepressants), comorbid conditions affecting facial movement (e.g., stroke, facial palsy), and cosmetic interventions such as botulinum toxin injections. Behavioral confounders arise from variability in gaze direction and head positioning, motion blur due to recording conditions, facial occlusions (e.g., facial hair, eyeglasses) [43], mood alterations or depressive symptoms [62], and emotional state. Technical and environmental factors include head pose, where yaw and roll introduce asymmetric distortion [42], lighting asymmetry, age-related facial texture changes, and video artifacts such as compression, blur, and frame drops can bias estimates.

Vulnerability depends on task and metric: short, peak-value metrics (e.g., posed grimacing) are fragile to brief occlusions or leaving frame, whereas naturalistic assessments based on mean or median movement values are more robust [41-43]. Many experts have excluded videos with more than 20% occluded frames, and normalized spatial scale to the intercanthal distance [41, 42].

Temporal resolution and windowing directly influence measurement stability. For example, assessment of the cheek region failed when computed as the difference between two consecutive frames (3.3 ms; F1 = 73%) but improved when calculated over a 5-frame window (16.6 ms; F1 = 81%) [42]. Similarly, at 30 FPS (≈30 ms per frame) blinks yield three samples, which is borderline for robust blink-phase analysis [43], while detailed characterization of opening and closing phases may require substantially higher frame rates (e.g., 1 kHz) [54].

Marker definition further determines robustness. Geometry-based markers (e.g., distances and angles between landmarks) are generally less affected by facial hair than surface-based markers but can still fail in the presence of eyeglass occlusion or light reflections [43].

A consistent failure mode is the coupling of head pose, occlusion, and task design. Facial symmetry estimates are highly sensitive to head position; even mild yaw or roll produces spurious asymmetry. Reading or image-description tasks may introduce self-occlusions when participants hold materials, though they can also intentionally elicit gaze shifts. Eyeglasses can obscure key regions even when the eyes remain partially visible, and facial hair may interfere with landmark or surface-based tracking; stubble may be partially mitigated through normalization, whereas longer hair (e.g., fringe) can obscure the forehead, eyebrows, or eyes. Additional occlusions may arise from hand-to-face contact or recording equipment such as EEG caps, NIRS sensors, microphones, or EMG electrodes.

### Acquisition framework: Face and head movements

Feasibility: 85% of domain experts estimated ≥70% of patients can meet mandatory criteria.

| **Parameter** | **Recommendation** | **Tier** |
| --- | --- | --- |
| Stable lighting | Diffuse, even illumination; avoid backlighting and shadows | Mandatory |
| Stable frontal head position (within ±20°) | Instruct patient to maintain frontal head orientation throughout recording, if task permits | Mandatory |
| Video resolution ≥HD (720p or higher) | Required for landmark precision on subtle facial movements | Mandatory |
| Face width ≥256 pixels (~20% of frame width) | Ensures sufficient resolution for facial landmark extraction | Mandatory |
| Facial occlusion <20% of recording time | Pre-define and document tolerance for occlusion (glasses, masks, hands) | Mandatory |
| Uniform, high-contrast background | Plain background improves landmark extraction reliability | Optimal |
| Calibration checkerboard or anthropomorphic reference | Enables metric measurement if required | Optimal |
| Second camera (30–60° angle) | Supports 3D head pose estimation and reduces out-of-plane ambiguity | Optimal |
| Audio synchronized with video | Required for speech-linked tasks (dysarthria, hypophonia) | Optimal |
| Complete absence of facial occlusion | Ideal but not always achievable; define exclusion criteria for severe occlusion | Contextual |
| Multimodal combination with additional video analysis | E.g. concurrent eye movement or head movement tracking | Contextual |
| Recording duration adapted to task requirements | Specify minimum duration per task type | Contextual |

**Supplementary Table** 2**.** Acquisition framework for creating measurement-grade video for face and head movement analysis

## **III. Hand and upper limb movements**

**Supplementary Figure** 7. **Domain-specific importance of acquisition parameters and failure modes for video-based hand and upper limb movement analysis based on Round 1 survey results**. Task definition and instruction clarity were the most frequently cited determinants, followed by camera viewpoint and occlusion minimization. Failure modes were dominated by self-occlusion, inconsistent task execution, and inappropriate framing. These results underscore the sensitivity particularly of hand motor assessments to both experimental design and conduction, hinting at the importance of standardized task protocols and careful consideration of task x video setup x algorithm interactions.

### Why the hand and upper limb movement domain matters clinically

Video-based analysis of hand and upper-limb movements is informative across Parkinson’s disease and parkinsonism, essential tremor, ataxia, dystonia, stroke, multiple sclerosis, ALS, and cerebral palsy. Frequently studied tasks such as finger tapping, hand opening–closing, pronation–supination, reaching, and tremor assessment derive from clinical scales such as MDS-UPDRS and Scale for the Assessment and Rating of Ataxia (SARA) [63, 64].

These gestures have defined neurobiological correlates. Repetitive movements engage supplementary motor, basal ganglia, and cerebellar timing networks, with distinct contributions for internally and externally paced actions [65]. Diadochokinesis and reach-to-grasp involve cerebellar and distributed motor loops supporting coordination and multi-joint control [66, 67], while tremor reflects oscillatory activity within basal ganglia–thalamo-cortical and cerebellar circuits [68].

Clinically relevant readouts include speed, rhythm or regularity, amplitude, amplitude decrement over time, and hesitation or halts, collectively described as the bradykinesia complex [69, 70]. Despite their relevance, measures of rigidity and spasticity, as well as more complex multi-segment gestures and tasks reflecting activities of daily living (eg hand–hand and hand–object interactions) remain underexplored [63].

Most studies assessing these tasks have been conducted in controlled clinical or research settings [63]. However, interest in telemedical and remote applications is increasing. The Parktest initiative [71] collected finger tapping data from 250 participants worldwide through a web-based interface, demonstrating good agreement between automatically extracted metrics and clinical scoring. Similarly, the TasTest [72] web platform and its mobile version, the TapTalk app [70] has collected more than 10,000 finger tapping videos from 4,000 individuals globally, incorporating webcam-based hand tracking for at-home motor–cognitive assessment; feasibility of TasTest has been demonstrated in over 2300 older adults performing tasks at home, where cognition, education, and mood did not significantly affect usability. Despite these advances, home-based acquisition introduces variability in devices, camera positioning, illumination, background clutter, and video quality, which directly impacts kinematic reliability.

### What needs to be visible and measurable

Visibility and viewpoint. Accurate kinematics require continuous visibility of the hand and upper limb. In finger tapping, consistent detection of thumb–index contact and stable fingertip tracking are critical for amplitude, rhythm, and sequence metrics; self-occluding viewpoints introduce tracking instability, including keypoint swaps, jitter, and dropouts [73, 74]. In reaching paradigms, occlusion of proximal segments can destabilize global pose estimation and degrades distal accuracy.

Spatial scale and scene. Measurement validity depends on Spatial resolution relative to capture volume. When the hand spans few pixels, subtle movements such as low-amplitude tapping or tremor approach the system’s resolution limit, and noise and model uncertainty disproportionately contaminate fine-grained features [73, 75]. Cluttered backgrounds further impair segmentation and keypoint detection [76].

Algorithm and protocol fit. Model assumptions interact with acquisition design; for example. Some frameworks rely on specific anatomical priors, such as palm-centered models in MediaPipe, and may fail under task-specific postures, necessitating protocol adaptations or algorithmic refinement [73]. Deep learning approaches based on hand segmentation rather than explicit keypoint detection can mitigate some failures, but remain underexplored and requires improved explainability [77].

Temporal resolution and compression directly influence feature validity. With adequate visibility, 30 fps can support estimation of gross kinematics. However, recordings acquired through video-conferencing platforms- often characterized by reduced frame rate, lower resolution, and compression artifacts- show decreased feature stability compared with recordings obtained directly from the device camera [70, 78]. For repetitive gestures in the range of 3–6 Hz and tremor between 3–12 Hz, frame rates of at least 60 fps are preferable when amplitude modulation or hesitation are target metrics, as higher temporal resolution reduces motion blur and missed extrema [79, 80]. Post-processing approaches such as video deblurring neural networks may partially improve video quality [81].

The impact of these factors is particularly pronounced in unconstrained or home-based recordings, where variability in acquisition conditions interacts with algorithmic limitations and task design. For reproducibility and data sharing, metadata should therefore report frame rate, resolution, camera intrinsics, calibration procedures when available, and recording geometry, including approximate camera–subject distance.

### Acquisition framework: Hand and upper limb movements

Feasibility: 94% of domain experts estimated ≥70% of patients can meet mandatory criteria, the highest feasibility across all domains.

| **Parameter** | **Recommendation** | **Tier** |
| --- | --- | --- |
| Framing / visibility | Hand and body fully within camera field of view for the full duration of the task | Mandatory |
| Distance | Prefer closer range (30–80 cm) for tasks involving complex finger dynamics (e.g. finger tapping, tremor) | Mandatory |
| Compression/ streaming | Prefer on-device recording over streamed video; avoid aggressive compression | Mandatory |
| Camera stability | Use tripod or stable mount (e.g. tabletop); avoid handheld recording for tremor tasks | Mandatory |
| Pilot testing | For underexplored tasks (e.g. pronation-supination, reaching): run pilot to characterize task × viewpoint × algorithm interactions and document failure modes before scaling | Mandatory |
| Viewpoint/ angle | Choose angle that minimizes self-occlusion; consider stereoscopic view when occlusion risk is high | Optimal |
| Frame rate | ≥60 fps when hesitation or frequency-related metrics are targeted (fast tapping, tremor); 30 fps may suffice for spatial and temporal estimation of slow movements | Optimal |
| Task instructions | Specify hand orientation, amplitude, speed, and which fingers are involved. Consistent verbal instructions across patients. | Optimal |
| Calibration/ scaling | If absolute amplitude is needed, use normalization or calibration (scale reference) or 3D tracking with validated accuracy (e.g. RGB-D) | Contextual |
| Expert oversight | Use expert-informed checks or rules to improve model interpretability | Contextual |

**Supplementary Table** 3**.** Acquisition framework for creating measurement-grade video for hand and upper limb movement analysis.

## **IV Gait and posture**

**Supplementary Figure** . **Domain-specific importance of acquisition parameters and key failure modes for video-based gait analysis based on Round 1 results.** Camera viewpoint, full-body visibility, and standardized task design emerged as dominant determinants of data quality. Failure modes were primarily related to incomplete body capture, multi-person scenes, and suboptimal camera perspectives. These findings highlight the importance of scene configuration and structured task execution, as well as the need for more controlled acquisition environments when deriving spatiotemporal gait metrics from videos using computer vision.

**Supplementary Figure . Domain-specific importance of acquisition parameters and failure modes for video-based assessments of posture and balance based on Round 1 sresults.** Camera viewpoint, patient positioning, and full-body visibility, including the lower extremities, were consistently rated as critical factors. Common failure modes included incomplete body capture, multiple persons in frame (e.g. clinicians performing the “pull-test”, or supporting a patient while walking), and clothing-related tracking issues. These findings highlight the importance of scene configuration, particularly in clinical environments where safety-related assistance may introduce unavoidable complexity.

### Why the gait and posture domain matters clinically

Gait and posture impairments are cardinal features of many neurological disorders, including neurodegenerative, neurodevelopmental, and acquired brain conditions [82, 83]. They are major determinants of mobility limitation and falls, the latter being closely linked to morbidity and loss of independence [84]. Quantitative assessment supports differential diagnosis, early detection of neurodegeneration, monitoring of disease progression or treatment response, and prospective fall risk assessment.

Accordingly, static and dynamic balance, gait, and posture evaluations are core components of widely used clinical rating scales such as the MDS-UPDRS [85]) and the SARA [86]), including tasks such as the retropulsion test and normal or narrow-based walking. More comprehensive functional test batteries, including the Mini-BESTest [87], Timed Up and Go (TUG [88]), and Functional Gait Assessment (FGA [89]), probe multiple contributors to postural instability and gait impairment (e.g., sensory, motor, and cognitive domains) and are particularly informative for differential diagnosis and fall risk stratification.

Neurobiologically, gait and postural disturbances reflect dysfunction within distributed locomotor control networks integrating vestibular, visual, and proprioceptive inputs with motor output shaped by the basal ganglia, cerebellum, brainstem, and higher-order frontal systems [90]. Because postural control is inherently a whole-body coordination task, quantitative characterization relies on spatiotemporal kinematic measures derived from full-body motion, including postural sway, stepping parameters (e.g., stride time, stride length, base of support), and joint dynamics such as arm swing [91, 92]. Beyond mean performance, step-to-step variability and gait asymmetries have emerged as sensitive markers of impaired motor control and early neurodegeneration, closely linked to postural instability and fall risk [93].

Clinically, gait disorders manifest as characteristic whole-body patterns such as hypokinetic, spastic, or ataxic gait, and phenomenological classification remains the starting point for diagnosis [82, 83, 94]. This paradigm translates naturally to computer vision–based approaches, which aim to quantify the same visually accessible motor signatures [95, 96].

### What needs to be visible and measurable

Accurate video-based analysis of gait and posture requires consistent full-body visibility, as relevant features emerge from coordinated multi-segment motion. Camera viewpoint is pivotal: frontal views are practical in constrained spaces, allowing longer walking distances to be captured [97], but introduce depth ambiguities in the sagittal plane, particularly in 2D pose estimation. Mitigation approaches include known depth references [97, 98], RGB-Depth sensing [99-101], or 2D-to-3D lifting. Lateral views provide complementary kinematic information but are more difficult to implement and less suited to base of support or turning measures [97, 102, 103]. Both perspectives encounter self-occlusions and keypoint dropouts; multi-camera setups, reduce these failures but are harder to scale in routine clinical workflows [104, 105].

Video quality directly determines measurement validity. Adequate spatial resolution is required, particularly for longer walking distances [106], and tracking performance may degrade with loose or very dark clothing or low body–background contrast [107]. Temporal resolution is critical: while 30 Hz is generally sufficient for estimating mean spatiotemporal parameters, frame rates above 60 Hz are typically required to reliably capture variability measures such as stride time variability [93, 100].

Scene complexity introduces additional challenges. Because gait recordings often use a wide field of view, bystanders (e.g., assisting staff) may be visible. Reliable patient identification therefore requires either controlled recording protocols (e.g., fixed positioning) or robust multi-person tracking and re-identification to ensure that extracted kinematic features correspond to the correct individual [99].

### Acquisition framework: Gait and posture

Feasibility: 79% of domain experts estimated ≥70% of patients can meet mandatory criteria. No domain expert rated >90% feasibility, reflecting practical space and equipment constraints in standard clinical settings.

| **Parameter** | **Recommendation** | **Tier** |
| --- | --- | --- |
| Framing / visibility | Entire body including feet continuously visible throughout each trial | Mandatory |
| Multi-person presence | Ideally only the participant in frame; if an assistant is required, maintain clear separation and avoid occlusion | Mandatory |
| Metadata reporting | Report device/model, resolution, fps, orientation, camera height, participant distance, setup type, task protocol, assistive device/assistant presence, and relevant clinical state | Mandatory |
| Camera setup (stability & height) | Fixed tripod or stable mount; camera approximately waist level (~1–1.5 m); constant across sessions | Optimal |
| Resolution | ≥1080p where possible; ensure adequate lower-limb pixel coverage | Optimal |
| Frame rate | ≥60 fps when targeting variability or rapid events; 30 fps may suffice for mean spatiotemporal parameters | Optimal |
| Viewpoint | Prefer frontal (toward/away) for pragmatic deployment; use lateral view when sagittal-plane kinematics are primary | Optimal |
| Environment (lighting, background, clothing) | Even diffuse lighting; neutral uncluttered background; sufficient body–background contrast; avoid loose, dark, or highly reflective clothing where feasible | Optimal |
| Trial length / repetitions | Multiple passes/laps preferred to increase stride count, particularly for variability metrics | Optimal |
| Algorithm–viewpoint adaptation | Adapt feature extraction to the most reliably visible keypoints for the chosen viewpoint | Optimal |
| Calibration / metric scaling | Include a scale reference or validated 3D/RGB-D methods when absolute spatial metrics are required | Contextual |
| Task standardization | Provide simple, standardized verbal instructions (e.g. walk at comfortable speed) | Contextual |

**Supplementary Table** 4**.** Acquisition framework for creating measurement-grade video for gait and posture analysis.

**Summary of the domain-specific frameworks**

In summary, across the four domains, hand and upper‑limb recordings were considered the most straightforward to implement in routine clinical practice, with 94% of experts judging ≥70% of patients able to meet mandatory criteria, reflecting relatively simple setup requirements and high tolerance to variability. Face and head movement protocols follow, with 85% feasibility, as they require only stable lighting, frontal pose, and high-definition resolution (720p or higher), though occlusion and head pose remain common pitfalls. Gait and posture assessments are moderately feasible (79%), but space constraints, full‑body visibility, and avoidance of multi‑person scenes introduce practical challenges in clinics. Eye‑movement recordings are the most technically demanding, with only 67% feasibility, due to strict requirements for high frame rates, precise framing, lighting, and occlusion control. Overall, feasibility decreases as spatiotemporal precision demands increase, making eye‑movement protocols the hardest and hand‑movement protocols the most straightforward to deploy.

**References**

1. Mantokoudis, G., J. Otero-Millan, and D.R. Gold, *Current concepts in acute vestibular syndrome and video-oculography.* Current opinion in neurology, 2022. **35**(1): p. 75-83.

2. Höglinger, G.U., et al., *Clinical diagnosis of progressive supranuclear palsy: the movement disorder society criteria.* Movement disorders, 2017. **32**(6): p. 853-864.

3. Bremova‐Ertl, T., et al., *A cross‐sectional, prospective ocular motor study in 72 patients with Niemann‐Pick disease type C.* European Journal of Neurology, 2021. **28**(9): p. 3040-3050.

4. Pellerin, D., et al., *GAA-FGF14 disease: defining its frequency, molecular basis, and 4-aminopyridine response in a large downbeat nystagmus cohort.* EBioMedicine, 2024. **102**.

5. Claassen, J., et al., *A randomised double-blind, cross-over trial of 4-aminopyridine for downbeat nystagmus—effects on slowphase eye velocity, postural stability, locomotion and symptoms.* Journal of Neurology, Neurosurgery & Psychiatry, 2013. **84**(12): p. 1392-1399.

6. Santhosh, S. and R. Kamaraj, *510 (k) premarket notification.* Research Journal of Pharmacy and Technology, 2018. **11**(12): p. 5675-5680.

7. Bastani, P.B., et al., *Smartphones versus goggles for video-oculography: current status and future direction.* Res Vestib Sci, 2024. **23**(3): p. 63-70.

8. Friedrich, M.U., et al., *Smartphone video nystagmography using convolutional neural networks: ConVNG.* Journal of neurology, 2023. **270**(5): p. 2518-2530.

9. Reinhardt, S., et al. *Smartphone-based videonystagmography using artificial intelligence*. in *Current Directions in Biomedical Engineering*. 2023. De Gruyter.

10. Phillips, V., et al., *A Pilot Study of Smartphone Eye Tracking for Detection of Positional Nystagmus.* Digital Biomarkers, 2025. **9**(1): p. 124-129.

11. Duvieusart, B., et al. *Towards Affordable Smartphone Eye Tracking for Nystagmus Analysis and Monitoring*. in *2025 47th Annual International Conference of the IEEE Engineering in Medicine and Biology Society (EMBC)*. 2025. IEEE.

12. Leigh, R.J. and D.S. Zee, *The neurology of eye movements*. 2015: Oxford university press.

13. Parker, T.M., et al., *Eye and head movement recordings using smartphones for telemedicine applications: measurements of accuracy and precision.* Frontiers in neurology, 2022. **13**: p. 789581.

14. Bastani, P.B., et al., *Quantifying induced nystagmus using a smartphone eye tracking application (EyePhone).* Journal of the American Heart Association, 2024. **13**(2): p. e030927.

15. Parker, T.M., et al., *Proof of concept for an “eyePhone” app to measure video head impulses.* Digital biomarkers, 2021. **5**(1): p. 1-8.

16. Koerner, J., et al., *Towards scalable screening for the early detection of Parkinson’s disease: validation of an iPad-based eye movement assessment system against a clinical-grade eye tracker.* npj Parkinson's Disease, 2025. **11**(1): p. 233.

17. Hassoumi, A., V. Peysakhovich, and C. Hurter, *Improving eye-tracking calibration accuracy using symbolic regression.* Plos one, 2019. **14**(3): p. e0213675.

18. Menezes, H.F., et al. *Bias and fairness in face detection*. in *2021 34th SIBGRAPI Conference on Graphics, Patterns and Images (SIBGRAPI)*. 2021. IEEE.

19. Takezawa, K., G. Townsend, and M. Ghabriel, *The facial nerve: anatomy and associated disorders for oral health professionals.* Odontology, 2018. **106**(2): p. 103-116.

20. Ekman, P. and W.V. Friesen, *Facial action coding system.* Environmental Psychology & Nonverbal Behavior, 1978.

21. Standring, S., *Gray's Anatomy E-Book: Gray's Anatomy E-Book*. 2021: Elsevier Health Sciences.

22. Bologna, M., et al., *Facial bradykinesia.* Journal of Neurology, Neurosurgery & Psychiatry, 2013. **84**(6): p. 681-685.

23. Fereshtehnejad, S.-M., et al., *Evolution of prodromal Parkinson’s disease and dementia with Lewy bodies: a prospective study.* Brain, 2019. **142**(7): p. 2051-2067.

24. Postuma, R.B., et al., *How does parkinsonism start? Prodromal parkinsonism motor changes in idiopathic REM sleep behaviour disorder.* Brain, 2012. **135**(6): p. 1860-1870.

25. Armstrong, R.A., *Visual signs and symptoms of progressive supranuclear palsy.* Clinical and Experimental Optometry, 2011. **94**(2): p. 150-160.

26. Phokaewvarangkul, O. and R. Bhidayasiri, *How to spot ocular abnormalities in progressive supranuclear palsy? A practical review.* Translational Neurodegeneration, 2019. **8**(1): p. 20.

27. Schröter, N., et al., *Significance of clinical symptoms and red flags in early differential diagnosis of Parkinson’s disease and atypical Parkinsonian syndromes.* Journal of Neural Transmission, 2023. **130**(6): p. 839-846.

28. Chunowski, P., N. Madetko-Alster, and P. Alster, *Asymmetry in atypical parkinsonian syndromes—a review.* Journal of Clinical Medicine, 2024. **13**(19): p. 5798.

29. Muñoz, E., A. Cervera, and J. Valls-Solé, *Neurophysiological study of facial chorea in patients with Huntington's disease.* Clinical neurophysiology, 2003. **114**(7): p. 1246-1252.

30. Fekete, R. and J. Jankovic, *Upper facial chorea in Huntington disease.* Journal of Clinical Movement Disorders, 2014. **1**(1): p. 7.

31. Collazo, I.V.M. and W. Tobin, *Facial myokymia and hemifacial spasm in multiple sclerosis: a descriptive study on clinical features and treatment outcomes.* The Neurologist, 2018. **23**(1): p. 1-6.

32. Lassemi, E., et al., *Oral and facial manifestations of patients with multiple sclerosis.* Dentistry, 2014. **4**(2): p. 1.

33. Masrori, P. and P. Van Damme, *Amyotrophic lateral sclerosis: a clinical review.* European journal of neurology, 2020. **27**(10): p. 1918-1929.

34. Verma, A. and M. DM, *Clinical manifestation and management of amyotrophic lateral sclerosis.* Exon Publications, 2021: p. 1-14.

35. Salari, M., et al., *A review of ocular movement abnormalities in hereditary cerebellar ataxias.* The Cerebellum, 2024. **23**(2): p. 702-721.

36. Levy, A. and A.E. Lang, *Ataxia‐telangiectasia: a review of movement disorders, clinical features, and genotype correlations.* Movement Disorders, 2018. **33**(8): p. 1238-1247.

37. Gierga, K., et al., *Involvement of the cranial nerves and their nuclei in spinocerebellar ataxia type 2 (SCA2).* Acta neuropathologica, 2005. **109**(6): p. 617-631.

38. Rajnoha, M., et al. *Towards identification of hypomimia in Parkinson's disease based on face recognition methods*. in *2018 10th International Congress on Ultra Modern Telecommunications and Control Systems and Workshops (ICUMT)*. 2018. IEEE.

39. Yang, N., et al., *Automated identification of early to mid-stage Parkinson’s disease using deep convolutional neural networks on static facial images.* Frontiers in Medical Technology, 2025. **7**: p. 1655199.

40. Abrami, A., et al., *Automated computer vision assessment of hypomimia in Parkinson disease: proof-of-principle pilot study.* Journal of medical Internet research, 2021. **23**(2): p. e21037.

41. Novotny, M., et al., *Automated video-based assessment of facial bradykinesia in de-novo Parkinson’s disease.* NPJ digital medicine, 2022. **5**(1): p. 98.

42. Rios-Urrego, C.D., et al., *Dynamic cheek surface modeling for enhanced hypomimia detection in Parkinson’s disease.* Computers in Biology and Medicine, 2025. **197**: p. 110896.

43. Kälble, L., et al., *Automatic analysis of eyelid movement in de-novo Parkinson’s disease.* npj Parkinson's Disease, 2025. **11**(1): p. 153.

44. Serbée, E., et al., *Facial expression analysis to uncover the relationship between sialorrhea and hypomimia in Parkinson’s disease.* Frontiers in Neurology, 2025. **16**: p. 1661043.

45. Bandini, A., et al., *Analysis of facial expressions in parkinson's disease through video-based automatic methods.* Journal of neuroscience methods, 2017. **281**: p. 7-20.

46. Bowers, D., et al., *Faces of emotion in Parkinsons disease: micro-expressivity and bradykinesia during voluntary facial expressions.* Journal of the International Neuropsychological Society, 2006. **12**(6): p. 765-773.

47. Gomez, L.F., et al. *Improving Parkinson detection using dynamic features from evoked expressions in video*. in *Proceedings of the IEEE/CVF Conference on Computer Vision and Pattern Recognition*. 2021.

48. Hou, X., et al., *A markerless 2d video, facial feature recognition–based, artificial intelligence model to assist with screening for parkinson disease: development and usability study.* Journal of medical Internet research, 2021. **23**(11): p. e29554.

49. Moshkova, A., et al. *Facial emotional expression assessment in parkinson’s disease by automated algorithm based on action units*. in *2020 27th Conference of Open Innovations Association (FRUCT)*. 2020. IEEE.

50. Su, G., et al., *Hypomimia recognition in Parkinson’s disease with semantic features.* ACM Transactions on Multimedia Computing, Communications, and Applications (TOMM), 2021. **17**(3s): p. 1-20.

51. Su, G., et al., *Detection of hypomimia in patients with Parkinson’s disease via smile videos.* Annals of Translational Medicine, 2021. **9**(16): p. 1307.

52. Rinn, W.E., *The neuropsychology of facial expression: a review of the neurological and psychological mechanisms for producing facial expressions.* Psychological bulletin, 1984. **95**(1): p. 52.

53. Francis, M., et al., *Rapid voluntary blinking as a clinical marker of parkinson’s disease.* Journal of Parkinson’s Disease, 2024. **14**(5): p. 993-997.

54. Kimura, N., et al., *Measurement of spontaneous blinks in patients with Parkinson's disease using a new high-speed blink analysis system.* Journal of the Neurological Sciences, 2017. **380**: p. 200-204.

55. Li, D., et al., *Automating the analysis of eye movement for different neurodegenerative disorders.* Computers in Biology and Medicine, 2024. **170**: p. 107951.

56. Marx, S., et al., *Validation of mobile eye-tracking as novel and efficient means for differentiating progressive supranuclear palsy from Parkinson's disease.* Frontiers in behavioral neuroscience, 2012. **6**: p. 88.

57. Quattrone, A., et al., *Video-oculographic biomarkers for evaluating vertical ocular dysfunction in progressive supranuclear palsy.* Parkinsonism & Related Disorders, 2022. **99**: p. 84-90.

58. Himle, M.B. and D.W. Woods, *An experimental evaluation of tic suppression and the tic rebound effect.* Behaviour research and therapy, 2005. **43**(11): p. 1443-1451.

59. Yang, J., et al., *Correlation between head tremble and the severity of Parkinson’s disease.* CNS Neuroscience & Therapeutics, 2022. **28**(2): p. 218-225.

60. Ali, M.R., et al., *Analyzing head pose in remotely collected videos of people with Parkinson’s disease.* ACM Transactions on Computing for Healthcare, 2021. **2**(4): p. 1-13.

61. Brach, J.S. and J. VanSwearingen, *Measuring fatigue related to facial muscle function.* Archives of physical medicine and rehabilitation, 1995. **76**(10): p. 905-908.

62. Gaebel, W. and W. Wölwer, *Facial expressivity in the course of schizophrenia and depression.* European archives of psychiatry and clinical neuroscience, 2004. **254**(5): p. 335-342.

63. Amprimo, G., et al., *Deep learning for hand tracking in Parkinson’s disease video-based assessment: current and future perspectives.* Artificial Intelligence in Medicine, 2024. **154**: p. 102914.

64. Friedrich, M.U., et al., *Computer vision in clinical neurology: a review.* JAMA neurology, 2025. **82**(4): p. 407-415.

65. Michely, J., et al., *Dopaminergic modulation of motor network dynamics in Parkinson’s disease.* Brain, 2015. **138**(3): p. 664-678.

66. Witt, S.T., A.R. Laird, and M.E. Meyerand, *Functional neuroimaging correlates of finger-tapping task variations: an ALE meta-analysis.* Neuroimage, 2008. **42**(1): p. 343-356.

67. Fasano, A., A. Mazzoni, and E. Falotico, *Reaching and grasping movements in Parkinson’s disease: a review.* Journal of Parkinson’s disease, 2022. **12**(4): p. 1083-1113.

68. Buijink, A.W., A.-F. van Rootselaar, and R.C. Helmich, *Connecting tremors–a circuits perspective.* Current opinion in neurology, 2022. **35**(4): p. 518-524.

69. Williams, S., et al., *The discerning eye of computer vision: Can it measure Parkinson's finger tap bradykinesia?* Journal of the Neurological Sciences, 2020. **416**: p. 117003.

70. Li, R., et al., *Moving towards intelligent telemedicine: Computer vision measurement of human movement.* Computers in Biology and Medicine, 2022. **147**: p. 105776.

71. Islam, M.S., et al., *Using AI to measure Parkinson’s disease severity at home.* NPJ digital medicine, 2023. **6**(1): p. 156.

72. Alty, J., et al., *The TAS Test project: a prospective longitudinal validation of new online motor-cognitive tests to detect preclinical Alzheimer’s disease and estimate 5-year risks of cognitive decline and dementia.* BMC neurology, 2022. **22**(1): p. 266.

73. Amprimo, G., et al., *Hand tracking for clinical applications: Validation of the Google MediaPipe Hand (GMH) and the depth-enhanced GMH-D frameworks.* Biomedical Signal Processing and Control, 2024. **96**: p. 106508.

74. Friedrich, M.U., et al., *Validation and application of computer vision algorithms for video-based tremor analysis.* npj Digital Medicine, 2024. **7**(1): p. 165.

75. Guarín, D.L., *Video-based quantification of hand postural tremor without external references. Integrating postural tremor quantification into visionMD.* npj Parkinson's Disease, 2025. **11**(1): p. 351.

76. Wang, X., et al., *Hand tremor detection in videos with cluttered background using neural network based approaches.* Health Information Science and Systems, 2021. **9**(1): p. 30.

77. Li, R., et al., *Evaluating the impact of human expertise in human-centered AI: A case study on finger-tapping video analysis for dementia detection.* Computers in Biology and Medicine, 2025. **194**: p. 110468.

78. Acevedo Trebbau, G.T., A. Bandini, and D.L. Guarin. *Video-based hand pose estimation for remote assessment of bradykinesia in Parkinson’s disease*. in *International Workshop on PRedictive Intelligence In MEdicine*. 2023. Springer.

79. Li, R., et al., *Rapid-Motion-Track: Markerless tracking of fast human motion with deep learning.* Intelligence-Based Medicine, 2024. **10**: p. 100162.

80. Wolke, R., et al., *Validity of tremor analysis using smartphone compatible computer vision frameworks.* Scientific reports, 2025. **15**(1): p. 13391.

81. Li, R., et al., *Parallel scale de-blur net for sharpening video images for remote clinical assessment of hand movements.* Expert Systems with Applications, 2024. **235**: p. 121093.

82. Snijders, A.H., et al., *Neurological gait disorders in elderly people: clinical approach and classification.* The Lancet Neurology, 2007. **6**(1): p. 63-74.

83. Jahn, K., A. Zwergal, and R. Schniepp, *Gait disturbances in old age: classification, diagnosis, and treatment from a neurological perspective.* Deutsches Ärzteblatt International, 2010. **107**(17): p. 306.

84. Schniepp, R., et al., *Fall prediction in neurological gait disorders: differential contributions from clinical assessment, gait analysis, and daily-life mobility monitoring.* Journal of neurology, 2021. **268**(9): p. 3421-3434.

85. Goetz, C.G., et al., *Movement Disorder Society‐sponsored revision of the Unified Parkinson's Disease Rating Scale (MDS‐UPDRS): scale presentation and clinimetric testing results.* Movement disorders: official journal of the Movement Disorder Society, 2008. **23**(15): p. 2129-2170.

86. Schmitz-Hubsch, T., et al., *Scale for the assessment and rating of ataxia: development of a new clinical scale.* Neurology, 2006. **66**(11): p. 1717-1720.

87. Franchignoni, F., et al., *Using psychometric techniques to improve the Balance Evaluation System’s Test: the mini-BESTest.* Journal of rehabilitation medicine: official journal of the UEMS European Board of Physical and Rehabilitation Medicine, 2010. **42**(4): p. 323.

88. Podsiadlo, D. and S. Richardson, *The timed “Up & Go”: a test of basic functional mobility for frail elderly persons.* Journal of the American geriatrics Society, 1991. **39**(2): p. 142-148.

89. Wrisley, D.M., et al., *Reliability, internal consistency, and validity of data obtained with the functional gait assessment.* Physical therapy, 2004. **84**(10): p. 906-918.

90. Jahn, K., et al., *Supraspinal locomotor control in quadrupeds and humans.* Progress in brain research, 2008. **171**: p. 353-362.

91. Lord, S., B. Galna, and L. Rochester, *Moving forward on gait measurement: toward a more refined approach.* Movement Disorders, 2013. **28**(11): p. 1534-1543.

92. Duarte, M., S. Freitas, and V. Zatsiorsky, *Control of equilibrium in humans—Sway over sway.* Motor Control: Theories, Experiments, and Applications, 2011: p. 219-242.

93. Hausdorff, J.M., *Gait variability: methods, modeling and meaning.* Journal of neuroengineering and rehabilitation, 2005. **2**(1): p. 19.

94. Nonnekes, J., et al., *Neurological disorders of gait, balance and posture: a sign-based approach.* Nature Reviews Neurology, 2018. **14**(3): p. 183-189.

95. Martínez‐García‐Peña, R., et al., *Video‐based data‐driven models for diagnosing movement disorders: review and future directions.* Movement Disorders, 2025. **40**(10): p. 2046-2066.

96. Roggio, F., et al., *A comprehensive analysis of the machine learning pose estimation models used in human movement and posture analyses: A narrative review.* Heliyon, 2024. **10**(21).

97. Stenum, J., et al., *Clinical gait analysis using video-based pose estimation: Multiple perspectives, clinical populations, and measuring change.* PLOS Digital Health, 2024. **3**(3): p. e0000467.

98. Shin, J.H., et al., *Quantitative gait analysis using a pose-estimation algorithm with a single 2D-video of Parkinson’s disease patients.* Journal of Parkinson’s Disease, 2021. **11**(3): p. 1271-1283.

99. Ellrich, N., et al., *Precision balance assessment in Parkinson’s disease: utilizing vision-based 3D pose tracking for pull test analysis.* Sensors, 2024. **24**(11): p. 3673.

100. Boborzi, L., et al., *Clinical Whole-Body Gait Characterization Using a Single RGB-D Sensor.* Sensors, 2025. **25**(2): p. 333.

101. Ferraris, C., et al., *From RGB-D to RGB-Only: Reliability and Clinical Relevance of Markerless Skeletal Tracking for Postural Assessment in Parkinson’s Disease.* Sensors, 2026. **26**(4): p. 1146.

102. Kidziński, Ł., et al., *Deep neural networks enable quantitative movement analysis using single-camera videos.* Nature communications, 2020. **11**(1): p. 4054.

103. Jeon, H., et al., *Spatiotemporal gait parameters during turning and imbalance in parkinson’s disease: Video-Based analysis from a single camera.* Journal of Movement Disorders, 2024. **18**(1): p. 87.

104. Uhlrich, S.D., et al., *OpenCap: Human movement dynamics from smartphone videos.* PLoS computational biology, 2023. **19**(10): p. e1011462.

105. Müller, B., et al., *Validation of enhanced kinect sensor based motion capturing for gait assessment.* PloS one, 2017. **12**(4): p. e0175813.

106. Ye, R.Z., et al., *Effects of image quality on the accuracy human pose estimation and detection of eye lid opening/closing using OpenPose and DLib.* Journal of Imaging, 2022. **8**(12): p. 330.

107. Andriluka, M., et al. *2d human pose estimation: New benchmark and state of the art analysis*. in *Proceedings of the IEEE Conference on computer Vision and Pattern Recognition*. 2014.
